# Supplementary material for: Contextual Complexities in Implementing a Family-Based Childhood Obesity Intervention: The Perspectives of Enrolled Children and Their Parents
Source: MDPI journal article supplement (doi:10.3390/children7120267), 2020-12-02
Supplement: s1 [file s1]

**Table S1.** Overview of the coding process and the second order analysis.

| Code groups                                                           | Subgroups                                                                                                                                                                                                                                                                                                                                                                                                                                                                                                                   | Second order analysis, theory of social contexts                                                                                                                                                                                                                    | Recontextualisation                                                                                                                                                                                                                                                                                                                                                                                                                                                                                                                                                                                                   |
|-----------------------------------------------------------------------|-----------------------------------------------------------------------------------------------------------------------------------------------------------------------------------------------------------------------------------------------------------------------------------------------------------------------------------------------------------------------------------------------------------------------------------------------------------------------------------------------------------------------------|---------------------------------------------------------------------------------------------------------------------------------------------------------------------------------------------------------------------------------------------------------------------|-----------------------------------------------------------------------------------------------------------------------------------------------------------------------------------------------------------------------------------------------------------------------------------------------------------------------------------------------------------------------------------------------------------------------------------------------------------------------------------------------------------------------------------------------------------------------------------------------------------------------|
| <b>The counselling sessions at the paediatric outpatient clinic</b>   | <ul style="list-style-type: none"> <li>- The parent's immediate experiences</li> <li>- The children's immediate experiences</li> <li>- Being measured and going on the scales</li> <li>- Telling the children about their obesity</li> <li>- The consequences of being obese (risk focus)</li> <li>- Tools: raw amount of fat in various snacks.</li> <li>- The rewarding</li> <li>- Health behaviour tasks</li> <li>- The time interval between sessions</li> </ul> <p>Family participation in the counselling session</p> | <p><b>Theme 1:</b> The families' pre-intervention context (section 6.1).</p> <p><b>Heading 1:</b> <i>"Obesity as a familial, common and abnormal issue"</i></p>                                                                                                     | <p><b>The family's everyday lives</b></p> <ul style="list-style-type: none"> <li>- Parent perceptions of the obesity issue in their living area</li> <li>- Family obesity narrative</li> <li>- Knowing other children/families with obesity issues</li> <li>- Experiences with earlier obesity-interventions</li> </ul> <p>The obesity issue in the media</p>                                                                                                                                                                                                                                                         |
| <b>The family's everyday lives</b>                                    | <ul style="list-style-type: none"> <li>- Parent perceptions of the obesity issue in their living area</li> <li>- Family obesity narrative</li> <li>- Knowing other children/families with obesity issues</li> <li>- Experiences with earlier obesity-interventions</li> </ul> <p>The obesity issue in the media</p>                                                                                                                                                                                                         | <p><b>Theme 2:</b> The context shaped in the counselling session (section 6.2),</p> <p><b>Heading 1:</b> "Explaining childhood obesity to children with obesity"</p>                                                                                                | <p><b>The counselling sessions at the paediatric outpatient clinic</b></p> <ul style="list-style-type: none"> <li>- The parent's immediate experiences</li> <li>- The children's immediate experiences</li> <li>- Being measured and going on the scales</li> <li>- Telling the children about their obesity</li> <li>- The consequences of being obese (risk focus)</li> <li>- Tools: raw amount of fat in various snacks.</li> <li>- The rewarding</li> <li>- Health behaviour tasks</li> <li>- The time interval between sessions</li> </ul> <p>Family participation in the counselling session</p>                |
| <b>The family's management and implementation of healthier habits</b> | <ul style="list-style-type: none"> <li>- Missing health behaviour tasks</li> <li>- Family habits and habits of the parents</li> <li>- The role of siblings</li> <li>- Divorced families</li> <li>- The role of dad</li> <li>- Implementation strategies and new rules</li> <li>- Rewarding</li> <li>- Weight focus</li> </ul> <p>Conflicts</p>                                                                                                                                                                              | <p><b>Theme 3:</b> Implementation of the intervention in family contexts (section 6.3, 6.4)</p> <p><b>Heading 3:</b> "Increased weight focus and split families"</p> <p><b>Heading 4:</b> "Blamed as a cheater or for the healthy spill-over effects on others"</p> | <p><b>The family's management and implementation of healthier habits</b></p> <ul style="list-style-type: none"> <li>- Missing health behaviour tasks</li> <li>- Family habits and habits of the parents</li> <li>- The role of siblings</li> <li>- Divorced families</li> <li>- The role of dad</li> <li>- Implementation strategies and new rules</li> <li>- Weight focus</li> <li>- Conflicts</li> </ul> <p><b>The role of the broader family</b></p> <ul style="list-style-type: none"> <li>- The role of grandparents</li> <li>- The role of aunts, uncles and cousins,</li> </ul> <p>Support and preferences</p> |
| <b>The role of the broader family</b>                                 | <ul style="list-style-type: none"> <li>- The role of grandparents</li> <li>- The role of aunts, uncles and cousins</li> <li>- Support and preferences</li> </ul>                                                                                                                                                                                                                                                                                                                                                            | <p><b>Theme 4:</b> The impact of other contexts on implementation (section 6.5)</p> <p><b>Heading 5:</b> "Pushing for change in unsupportive environments"</p>                                                                                                      | <p><b>The role of other settings</b></p> <ul style="list-style-type: none"> <li>- At school</li> <li>- At sport and leisure activities</li> <li>- Spending time with friends and friends' families</li> </ul>                                                                                                                                                                                                                                                                                                                                                                                                         |
| <b>The role of other settings</b>                                     | <ul style="list-style-type: none"> <li>- At school</li> <li>- At sport and leisure activities</li> <li>- Spending time with friends and friends' families</li> </ul>                                                                                                                                                                                                                                                                                                                                                        | <p><b>Theme 5:</b> The children's new post-intervention context (section 6.6)</p> <p><b>Heading 6:</b> "The children's new context"</p>                                                                                                                             | <p><b>The counselling sessions at the paediatric outpatient clinic</b></p> <ul style="list-style-type: none"> <li>- The consequences of being obese (risk focus)</li> <li>- The rewarding</li> </ul> <p><b>The role of other settings</b></p> <ul style="list-style-type: none"> <li>- At school</li> <li>- At sport and leisure activities</li> </ul>                                                                                                                                                                                                                                                                |

- 
- Spending time with friends and friends' families

**The family's management and implementation of healthier habits**

- Implementation strategies and new rules
- Rewarding

Weight focus

---
